# Supplementary material
Source: PubMed Central journal article supplement (PMC6365680)

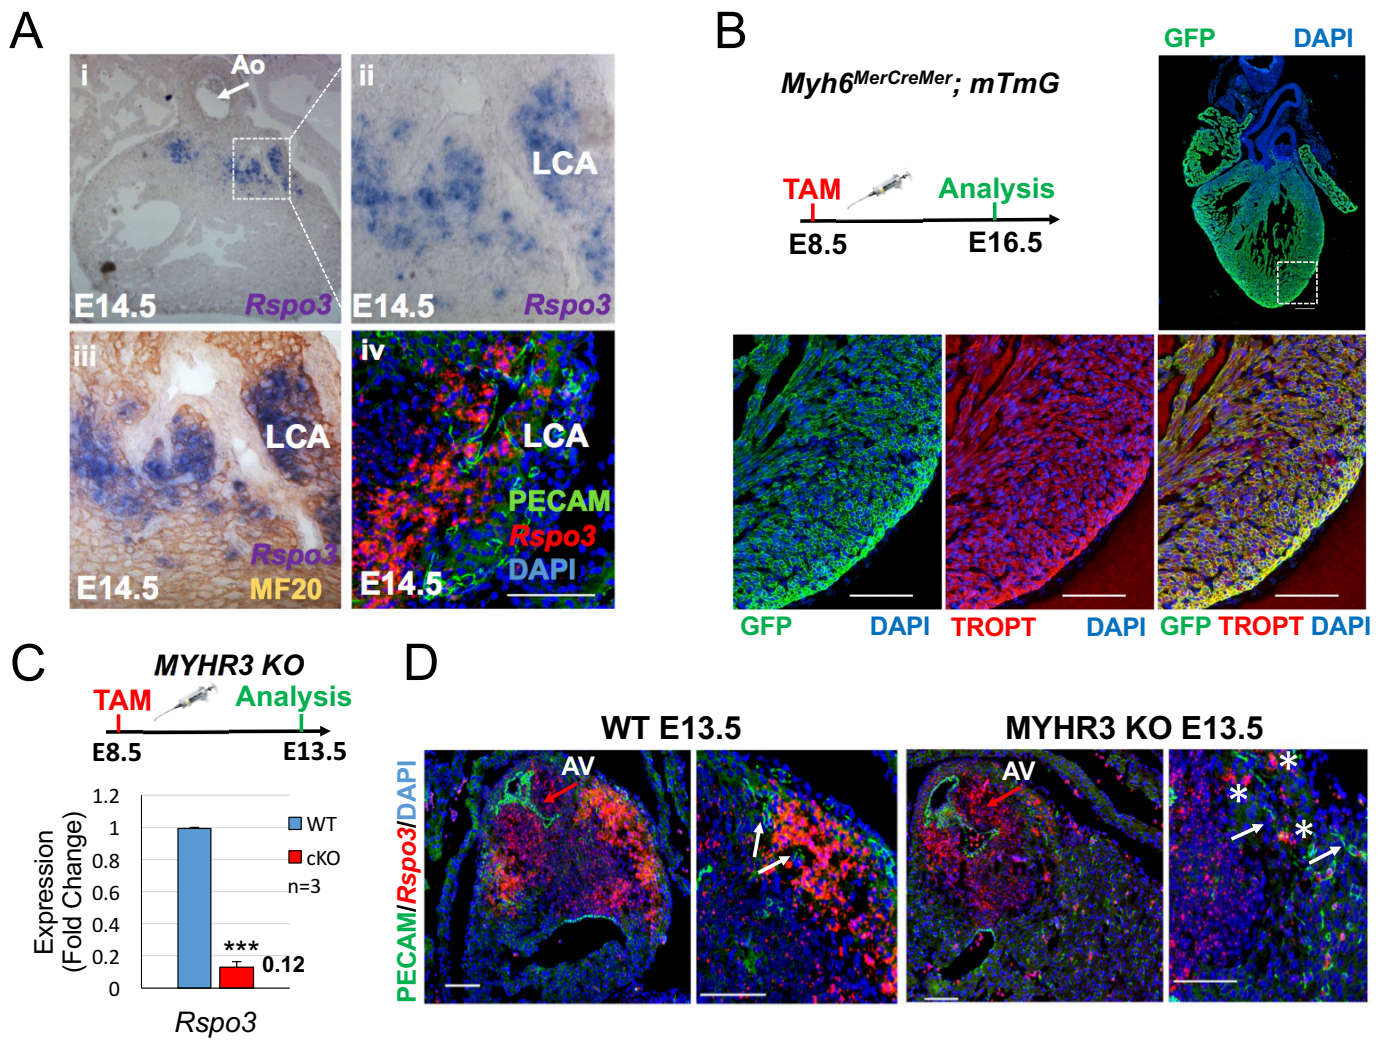

Figure 1

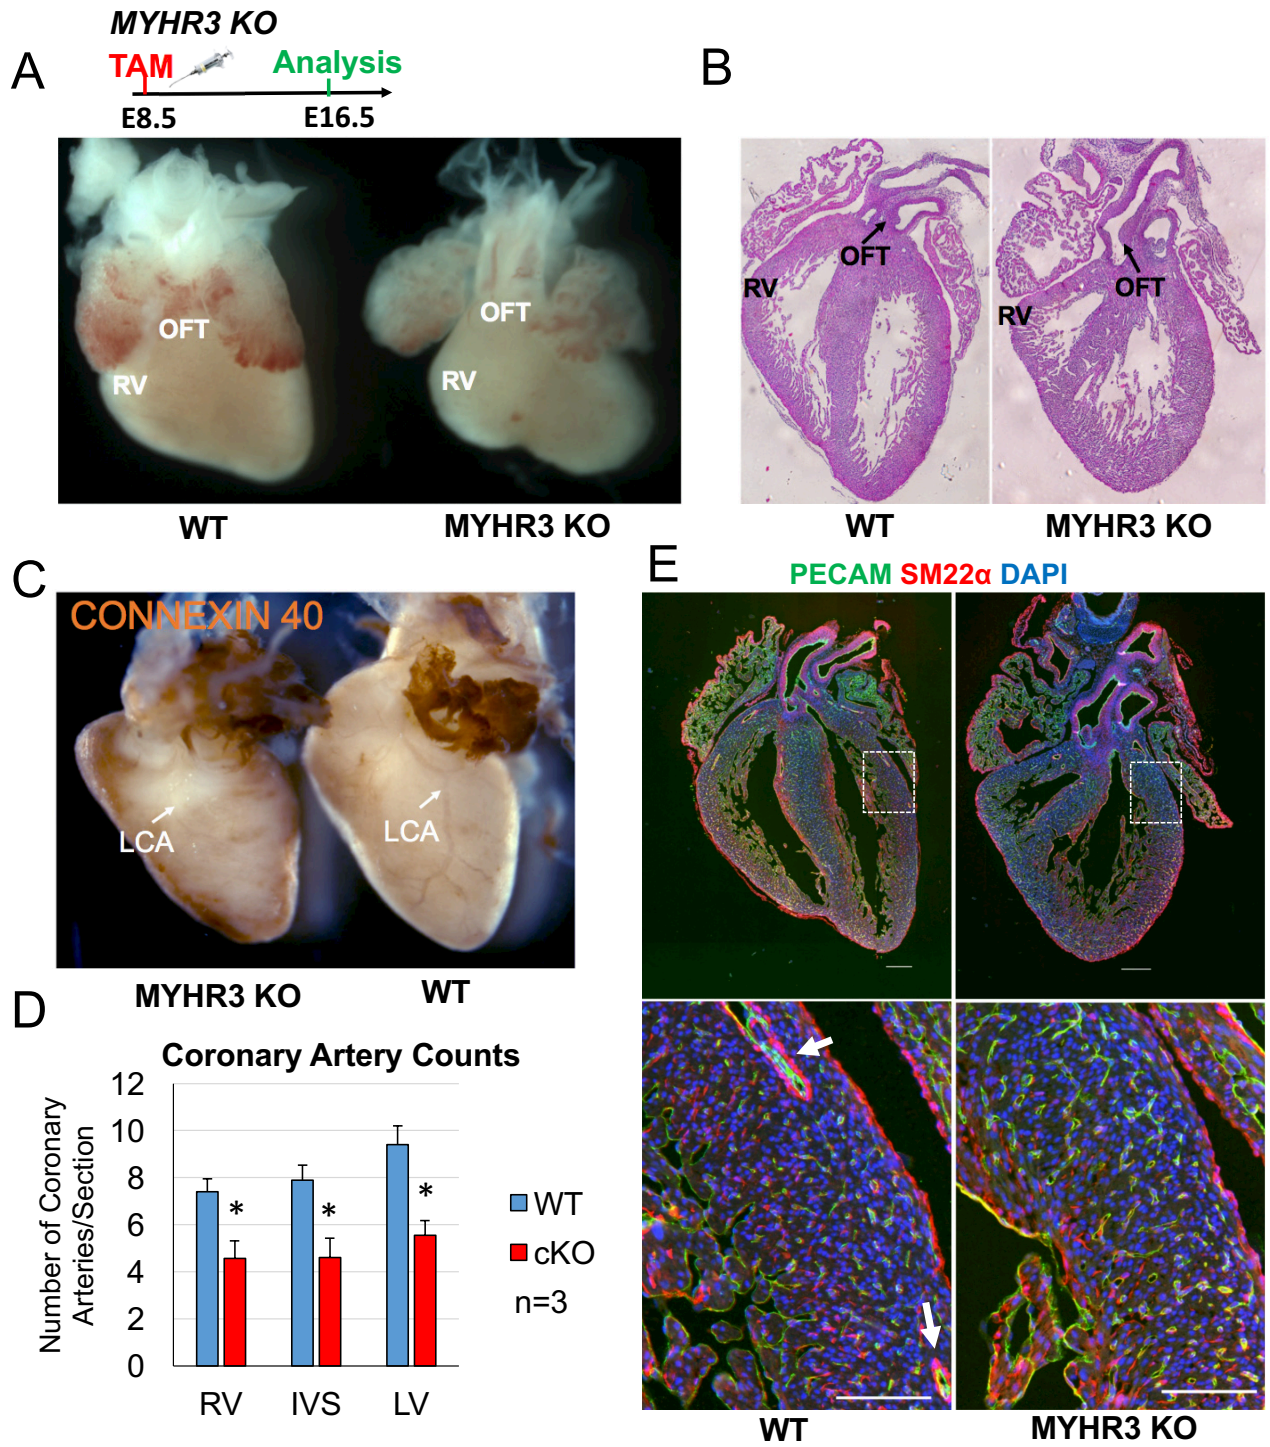

Figure 2

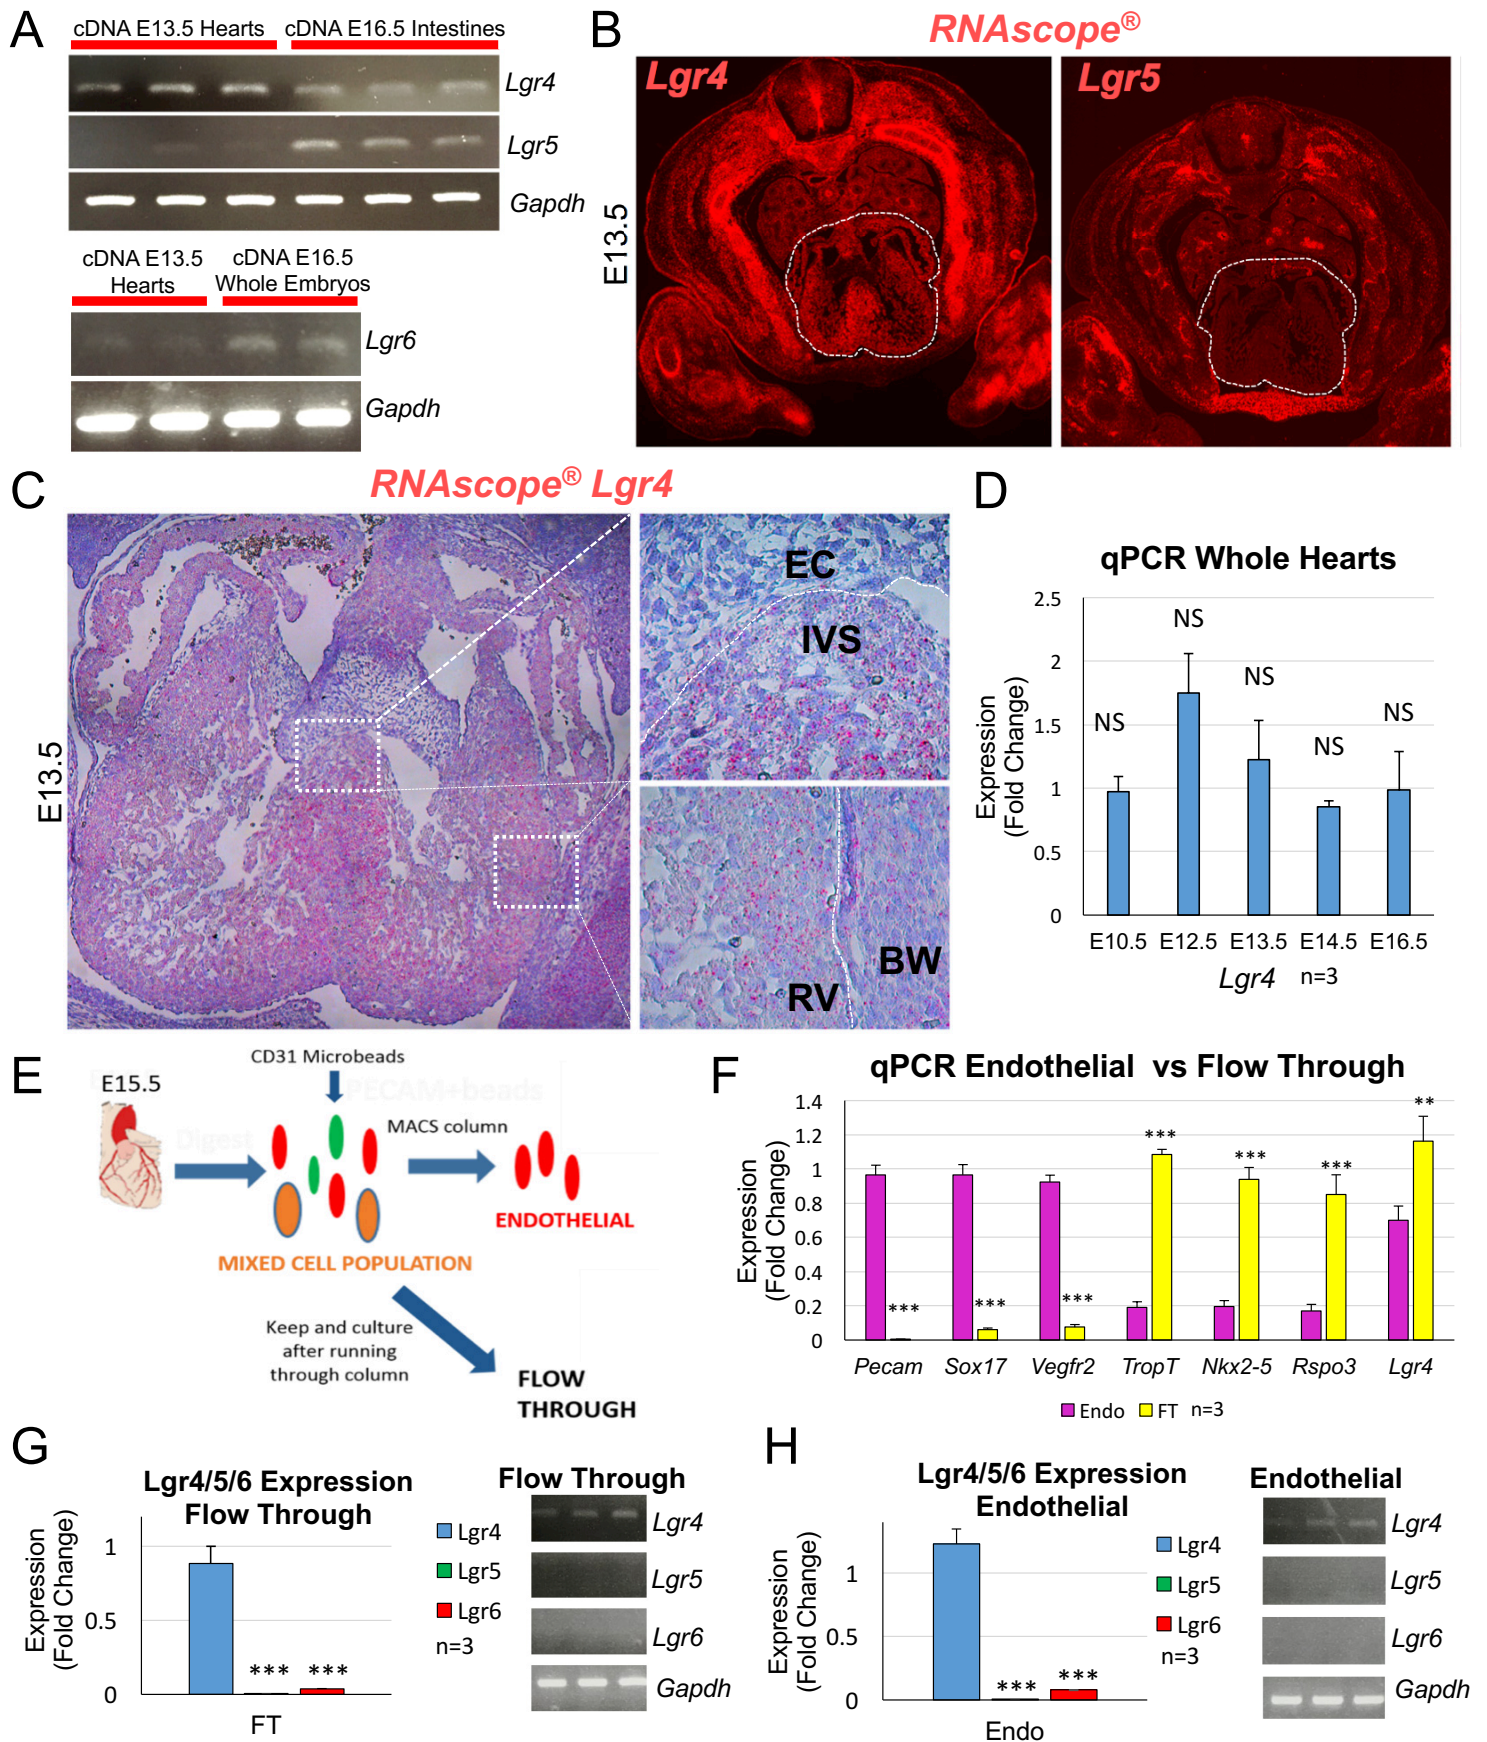

**Figure 3**

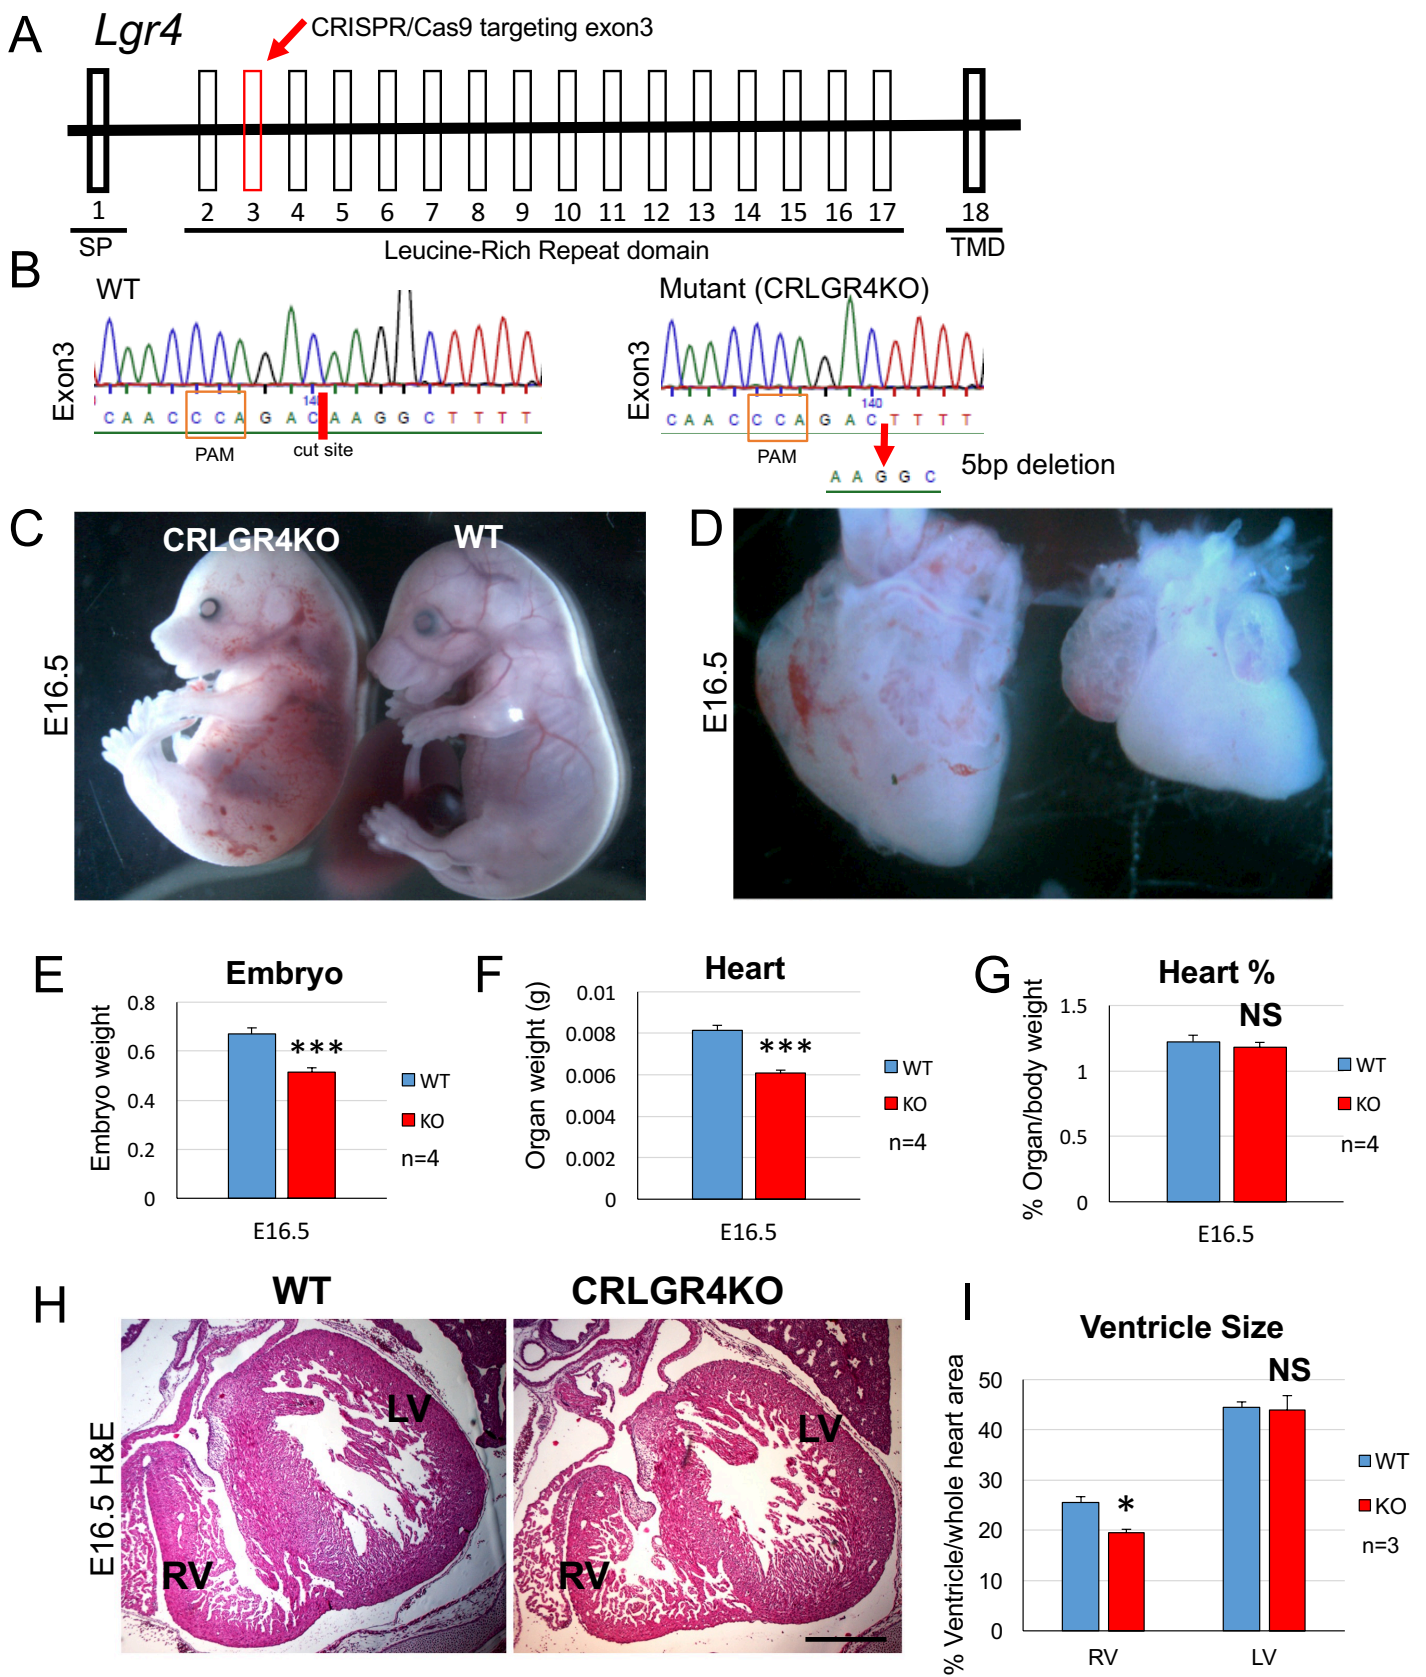

Figure 4

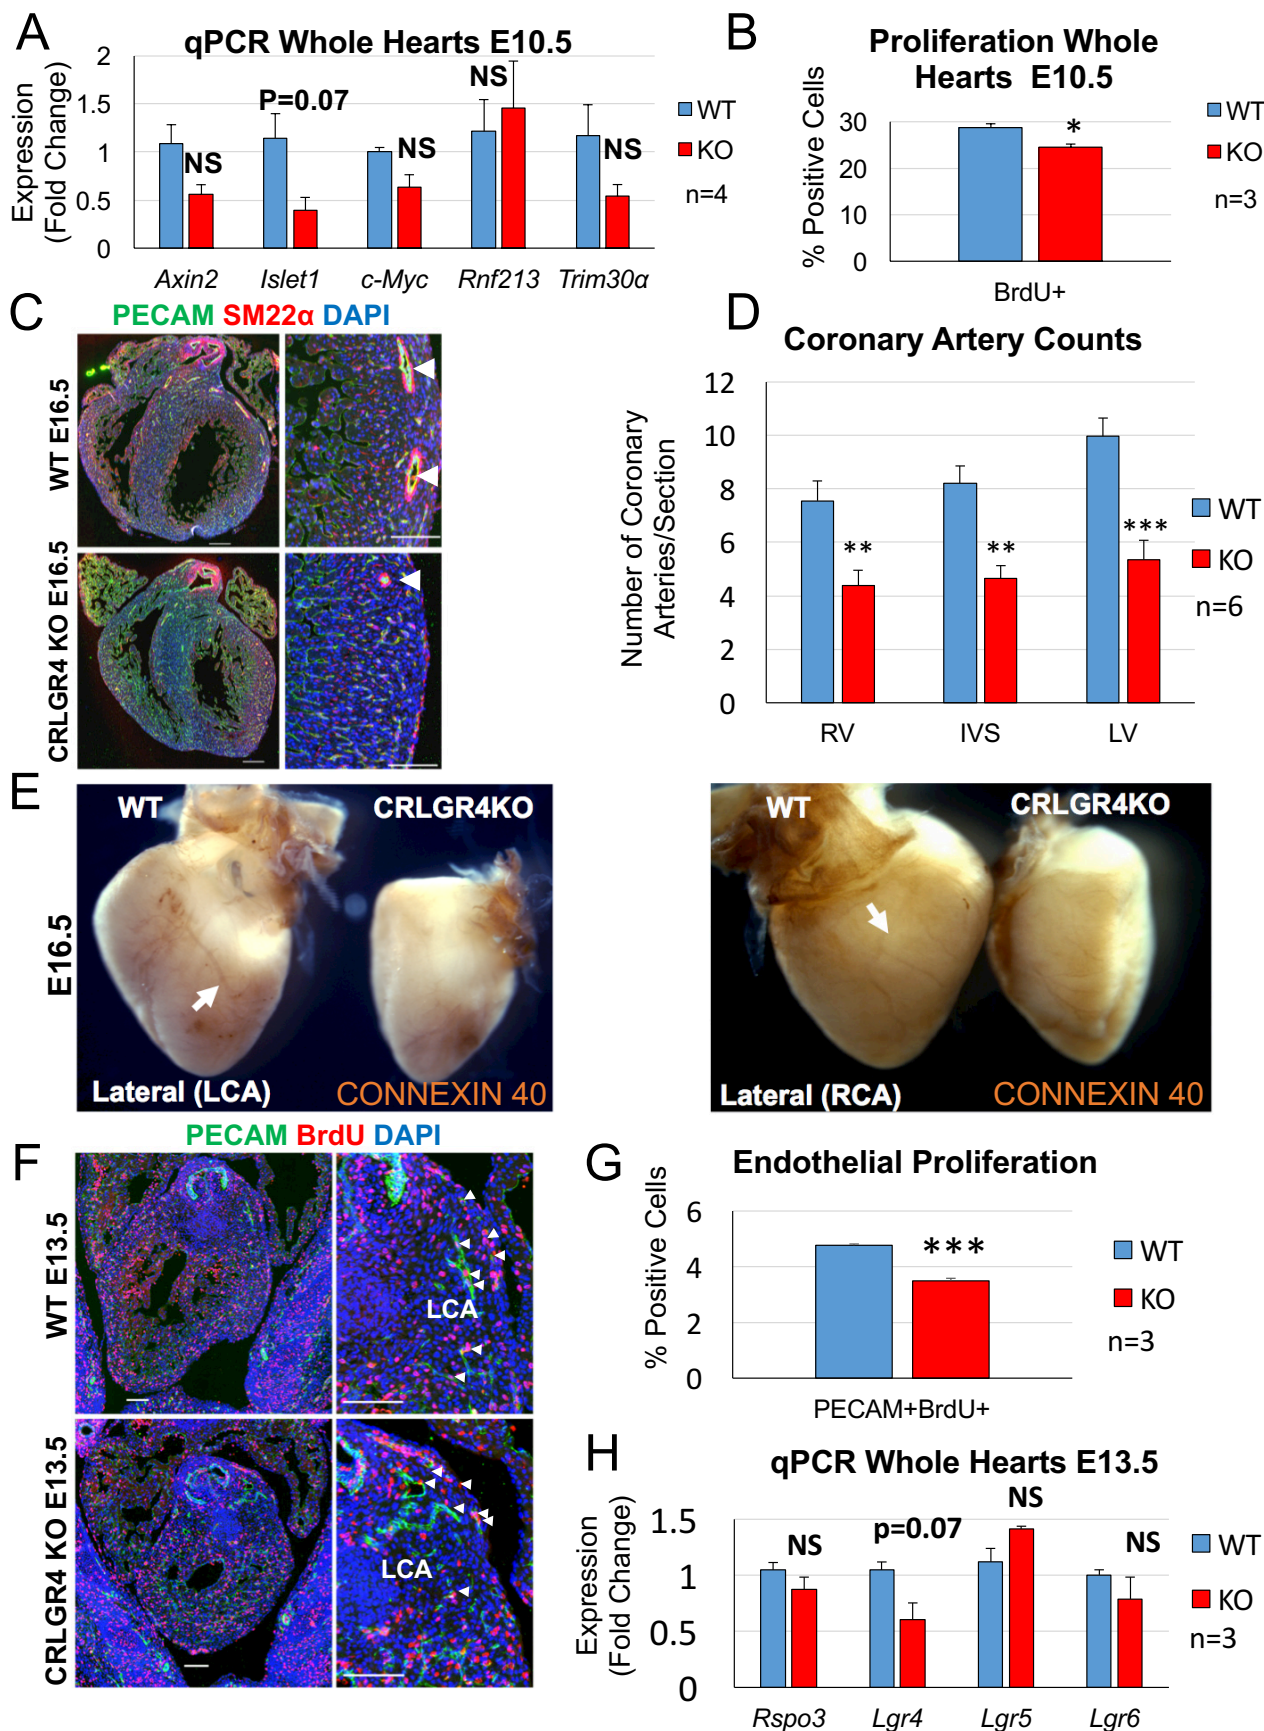

**Figure 5**

Supplement: NIHMS973885-supplement-1.pdf [file NIHMS973885-supplement-1.pdf]
